# Supplementary material for: Improving the Nutritional Status of Socially Vulnerable Children in Manaus, Brazilian Amazon, through a Food Supplementation Programme
Source: MDPI journal article supplement (doi:10.3390/nu16071051), 2024-04-04
Supplement: s1 [file s1]

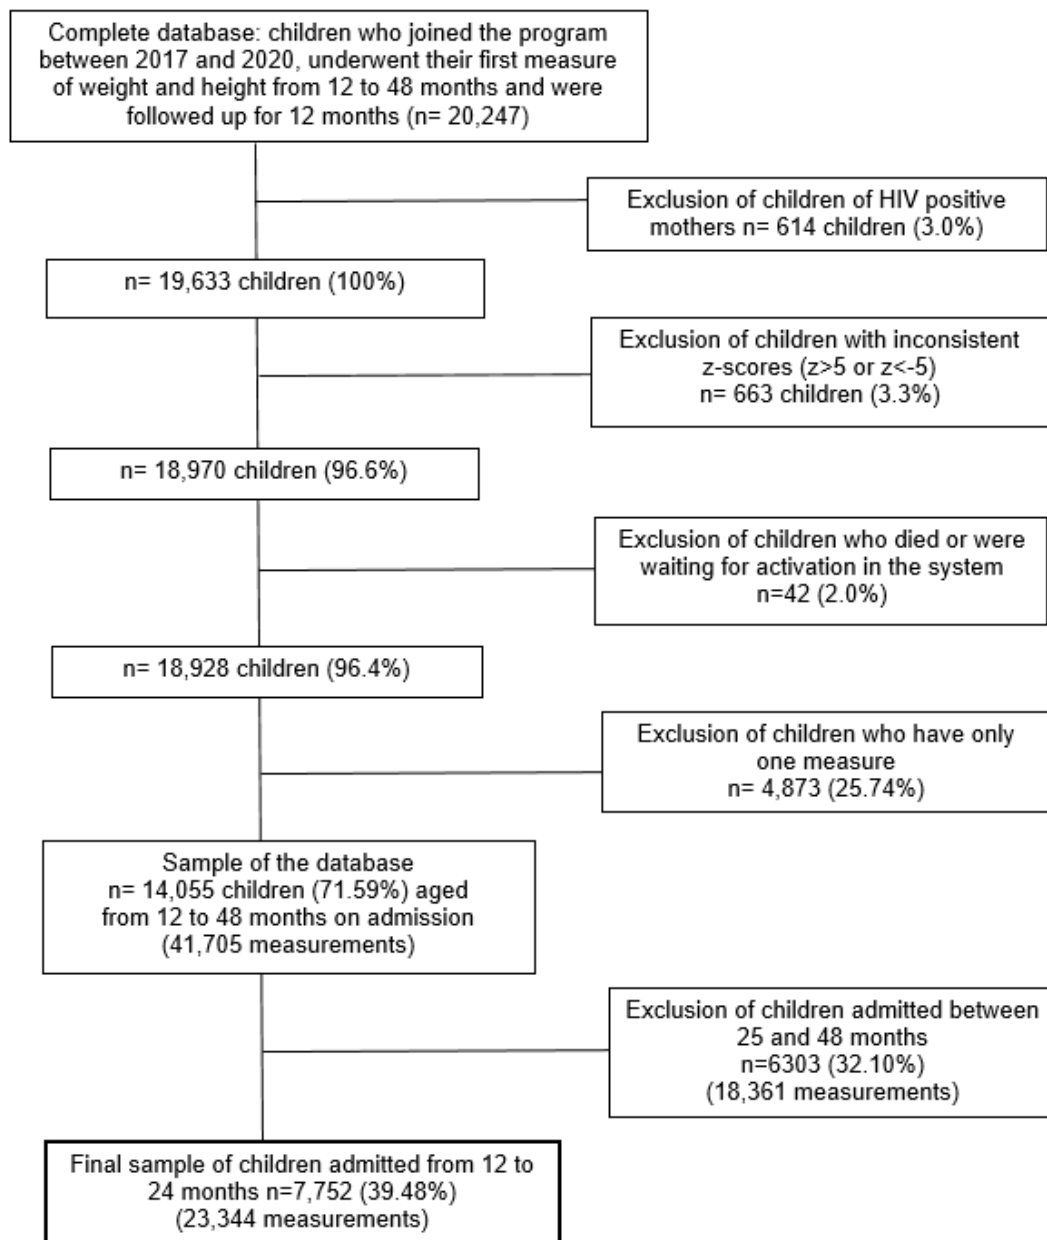

Figure S1. Sample selection process flowchart.

**Table S1.** Nutritional composition of the infant formula used as a food supplement for children aged 12–24 months in the program “Leite do Meu Filho” (Manaus, 2017–2020).

| Energy and Nutrient Value     | Unit           | In 100g of powder | In 100 ml of reconstituted formula |
|-------------------------------|----------------|-------------------|------------------------------------|
| Energetic value               | kcal           | 472               | 67                                 |
| Energetic value               | kJ             | 1982              | 281                                |
| Carbohydrates                 | g              | 58                | 8.3                                |
| Lactose                       | g              | 44                | 6.2                                |
| Proteins                      | g              | 11                | 1.5                                |
| Total fat                     | g              | 22                | 3.1                                |
| Saturated fat                 | g              | 8.0               | 1.1                                |
| Trans fats                    | g              | 0                 | 0                                  |
| Linoleic acid                 | g              | 3.1               | 0.4                                |
| $\alpha$ -linolenic acid      | mg             | 380               | 54                                 |
| Dietary fiber, of which:      | g              | 2.9               | 0.4                                |
| Galactooligosaccharides (GOS) | g              | 2.6               | 0.4                                |
| Fructooligosaccharides (FOS)  | g              | 0.29              | 0.04                               |
| Sodium                        | mg             | 240               | 34                                 |
| Calcium                       | mg             | 550               | 78                                 |
| Iron                          | mg             | 7.8               | 1.1                                |
| Potassium                     | mg             | 625               | 89                                 |
| Chloride                      | mg             | 320               | 45                                 |
| Phosphor                      | mg             | 310               | 44                                 |
| Magnesium                     | mg             | 60                | 8.5                                |
| Iodine                        | $\mu$ g        | 150               | 21                                 |
| Copper                        | $\mu$ g        | 360               | 51                                 |
| Zinc                          | mg             | 5.6               | 0.80                               |
| Selenium                      | $\mu$ g        | 11                | 1.6                                |
| Manganese                     | $\mu$ g        | 60                | 8.5                                |
| Vitamin A                     | Mg RE          | 570               | 81                                 |
| Vitamin D                     | $\mu$ g        | 11                | 1.5                                |
| Vitamin E                     | mg $\alpha$ TE | 11                | 1.5                                |
| Vitamin K                     | $\mu$ g        | 45                | 6.4                                |
| Vitamin C                     | mg             | 75                | 11                                 |
| Vitamin B1                    | mg             | 1.0               | 0.14                               |
| Vitamin B2                    | mg             | 1.2               | 0.17                               |
| Niacin                        | mg             | 5.0               | 0.71                               |
| Vitamin B6                    | mg             | 0.58              | 0.08                               |
| Folic acid                    | $\mu$ g        | 130               | 18                                 |
| Pantothenic acid              | mg             | 6.4               | 0.91                               |
| Vitamin B12                   | $\mu$ g        | 1.5               | 0.21                               |
| Biotin                        | $\mu$ g        | 24                | 3.4                                |
| Choline                       | mg             | 80                | 11                                 |
| Inositol                      | mg             | 35                | 5.0                                |
